# Supplementary material for: Distinctive antibody responses to Mycobacterium tuberculosis in pulmonary and brain infection
Source: PubMed Central journal article supplement (PMC11370789; doi:10.1093/brain/awae066), 2024-03-05
Supplement: awae066_supplementary_data.pdf [file awae066_supplementary_data.pdf]

## Supplemental material

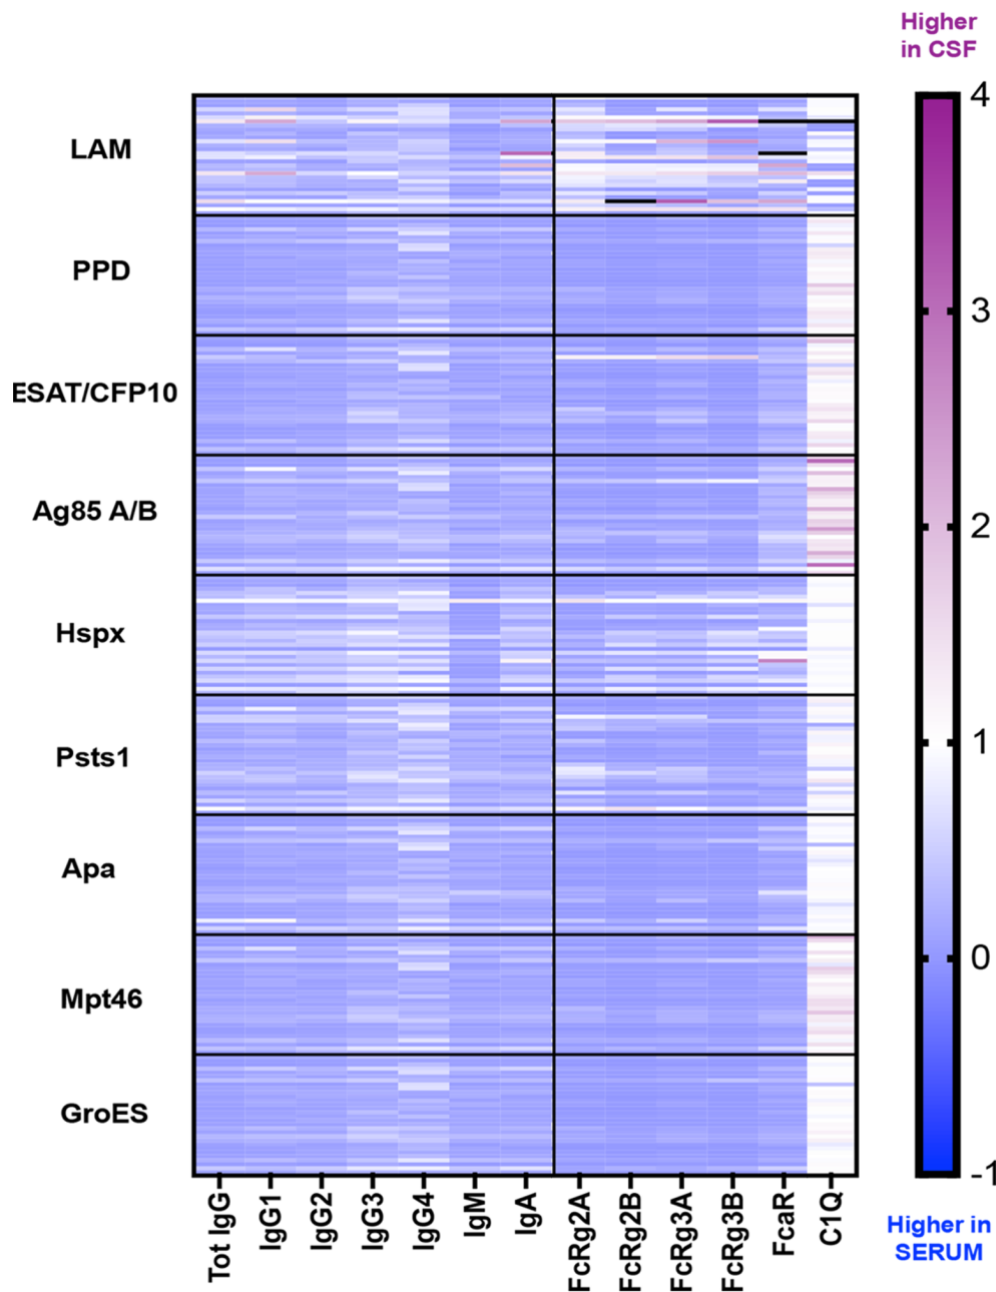

**Supplemental Fig. 1. Enrichment of C1q binding antibodies in CSF of TBM.** Heatmap showing CSF:serum ratios of IgG subclasses (1–4), IgM, IgA, and binding to FcRs (Fc $\gamma$ R2A, Fc $\gamma$ R2B, Fc $\gamma$ R3A, Fc $\gamma$ R3B, Fc $\alpha$ R) and C1q for each antigenic target (LAM, PPD, ESAT/CFP10, Ag85 A/B, Hspx, PstS1, Apa, Mpt46, GroES). This shows an overall higher titer and FcR binding capacity by serum antibodies, in contrast to a relative enrichment of C1q binding antibodies in CSF. CSF:serum ratios are color coded (>1 in purple, indicating enrichment in CSF, <1 in blue, indicating enrichment in serum).

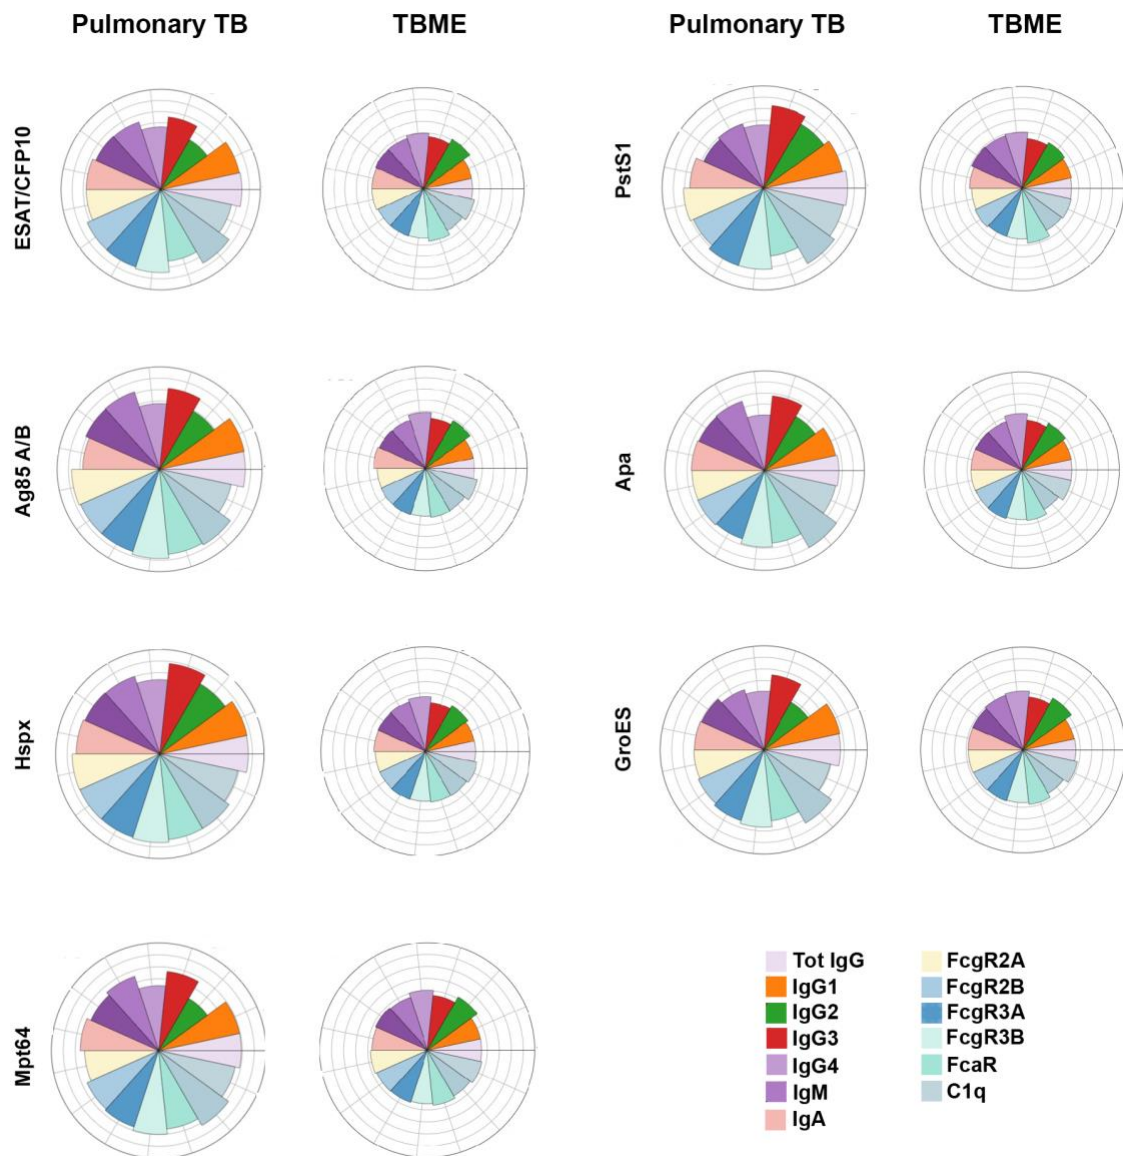

**Supplemental Fig. 2. Pulmonary TB shows *Mtb*-specific antibodies with higher titers and FcR binding capacity than TB meningitis (TBM).** Flower plots showing IgG subclasses (1–4), IgM, IgA, binding to FcRs (FcγR2A, FcγR2B, FcγR3A, FcγR3B, FcαR) and C1q in pulmonary TB versus TBME, across different antigen specificities (ESAT/CFP10, Ag85 A/B, Hspx, PstS1, Apa, Mpt46, GroES). Each flower plot summarizes the data from the respective group and the length of each petal represents the average of the Z-scored value for the indicated feature.
